# Supplementary material for: Long-Term Simulated Direct N2O Emissions from German Oilseed Rape Cultivation below the IPCC Emission Factor
Source: MDPI journal article supplement (doi:10.3390/agriculture14010070), 2023-12-29
Supplement: s1 [file s1]

## Supplementary Materials

*Table S1: Geographic locations of the study sites*

| Site         | Coordinates (Lat, Long) | Height a.s.l. [m] |
|--------------|-------------------------|-------------------|
| Berge        | 52.62 N, 12.78 E        | 40                |
| Dedelow      | 53.37 N, 13.83 E        | 34                |
| Hohenschulen | 54.31 N, 9.99 E         | 30                |
| Ihinger Hof  | 48.74 N, 8.92 E         | 479               |
| Merbitz      | 51.62 N, 11.91 E        | 153               |

*Table S2: Dates of WOSR sowing and WOSR harvest for the five studied sites and the three investigated cropping periods.*

| Site         | Cropping period | Sowing date | Fertilization (1 <sup>st</sup> /2 <sup>nd</sup> split) | Harvest date | — |
|--------------|-----------------|-------------|--------------------------------------------------------|--------------|---|
| Berge        | 2012/2013       | 10.09.2012  | 04.04./02.05.2013                                      | 01.08.2013   |   |
|              | 2013/2014       | 05.09.2013  | 19.02./09.04.2014                                      | 16.07.2014   |   |
|              | 2014/2015       | 03.09.2014  | 17.02./24.03.2015                                      | 28.07.2015   |   |
| Dedelow      | 2012/2013       | 20.08.2012  | 05.03./17.04.2013                                      | 01.08.2013   |   |
|              | 2013/2014       | 26.08.2013  | 11.03./11.03.2014                                      | 18.07.2014   |   |
|              | 2014/2015       | 25.08.2014  | 03.03./24.03.2015                                      | 31.07.2015   |   |
| Hohenschulen | 2012/2013       | 29.08.2012  | 04.04./23.04.2013                                      | 05.08.2013   |   |
|              | 2013/2014       | 28.08.2013  | 12.03./01.04.2014                                      | 19.07.2014   |   |
|              | 2014/2015       | 27.08.2014  | 17.03./08.04.2015                                      | 04.08.2015   |   |
| Ihinger Hof  | 2012/2013       | 28.08.2012  | 13.03./15.04.2013                                      | 02.08.2013   |   |
|              | 2013/2014       | 24.08.2013  | 25.02./24.03.2014                                      | 18.07.2014   |   |
|              | 2014/2015       | 23.08.2014  | 09.03./13.04.2015                                      | 21.07.2015   |   |
| Merbitz      | 2012/2013       | 29.08.2012  | 09.04./02.05.2013                                      | 26.07.2013   |   |
|              | 2013/2014       | 21.08.2013  | 10.03./08.04.2014                                      | 16.07.2014   |   |
|              | 2014/2015       | 20.08.2014  | 10.03./08.04.2015                                      | 22.07.2015   |   |

Table S3: Main characteristics of the digestates used at the five study sites

| Site         | Year | Substrate before digestion       | DM<br>[%] | N <sub>total</sub><br>[%] | NH <sub>4</sub> -N<br>[%] |
|--------------|------|----------------------------------|-----------|---------------------------|---------------------------|
| Berge        | 2013 | cattle slurry/maize/grass silage | 8.4       | 0.6                       | 0.4                       |
|              | 2014 |                                  | 9.2       | 0.5                       | 0.2                       |
|              | 2015 |                                  | 10.5      | 0.5                       | 0.2                       |
| Dedelow      | 2013 | cattle slurry/maize silage       | 6.0       | 0.3                       | 0.1                       |
|              | 2014 |                                  | 6.1       | 0.3                       | 0.2                       |
|              | 2015 |                                  | 7.8       | 0.5                       | 0.2                       |
| Hohenschulen | 2013 | cattle slurry/maize silage       | 6.8       | 0.4                       | 0.3                       |
|              | 2014 |                                  | 7.1       | 0.5                       | 0.3                       |
|              | 2015 |                                  | 8.1       | 0.5                       | 0.3                       |
| Ihinger Hof  | 2013 | pig slurry/maize/grass silage    | 8.9       | 0.5                       | 0.3                       |
|              | 2014 |                                  | 10.1      | 0.6                       | 0.3                       |
|              | 2015 |                                  | 8.7       | 0.6                       | 0.4                       |
| Merbitz      | 2013 | cattle slurry/maize silage       | 5.2       | 0.3                       | 0.2                       |
|              | 2014 |                                  | 5.1       | 0.3                       | 0.2                       |
|              | 2015 |                                  | 5.0       | 0.3                       | 0.2                       |

Table S4: Values of statistical criteria used to evaluate the SMN submodel relative to observations of SMN (0-30 cm) (For a more detailed presentation see Rübiger et al. (2020))

| Site         | Parameter | Observations | r <sup>2</sup>    | slope | intercept | RMSE<br>kg N ha <sup>-1</sup> |
|--------------|-----------|--------------|-------------------|-------|-----------|-------------------------------|
| Berge        | SMN 0-30  | 768          | 0.15 (0.13 -0.22) | 0.30  | 26.0      | 33.62                         |
| Dedelow      | SMN 0-30  | 838          | 0.43 (0.41-0.59)  | 0.76  | 12.3      | 31.42                         |
| Hohenschulen | SMN 0-30  | 697          | 0.53 (0.40-0.74)  | 0.76  | 6.8       | 13.04                         |
| Ihinger Hof  | SMN 0-30  | 681          | 0.32 (0.20-0.48)  | 0.39  | 16.6      | 26.52                         |
| Merbitz      | SMN 0-30  | 963          | 0.48 (0.50-0.54)  | 0.68  | 18.2      | 21.96                         |

Table S5: Values of statistical criteria used to evaluate the simulation of soil water content by PSAM (For a more detailed presentation see Rübiger et al. (2020))

| Site         | Parameter | Observations | r <sup>2</sup>   | slope | intercept | RMSE<br>cm <sup>3</sup> cm <sup>-3</sup> |
|--------------|-----------|--------------|------------------|-------|-----------|------------------------------------------|
| Berge        | WC 0-30   | 800          | 0.39 (0.32-0.59) | 0.435 | 0.12      | 0.06                                     |
| Dedelow      | WC 0-30   | 852          | 0.72 (0.58-0.82) | 0.818 | 0.05      | 0.03                                     |
| Hohenschulen | WC 0-30   | 704          | 0.51 (0.44-0.64) | 0.677 | 0.06      | 0.04                                     |
| Ihinger Hof  | WC 0-30   | 689          | 0.45 (0.37-0.60) | 0.371 | 0.22      | 0.05                                     |
| Merbitz      | WC 0-30   | 988          | 0.62 (0.37-0.83) | 0.623 | 0.14      | 0.05                                     |

## Reference

Räbiger T, Andres M, Hegewald H, et al (2020) Indirect nitrous oxide emissions from oilseed rape cropping systems by NH<sub>3</sub> volatilization and nitrate leaching as affected by nitrogen source, N rate and site conditions. Eur J Agron 116:126039. <https://doi.org/10.1016/j.eja.2020.126039>
